# Supplementary material for: The mitochondrial‐derived peptide MOTS‐c is a regulator of plasma metabolites and enhances insulin sensitivity
Source: PubMed Central journal article supplement (PMC6640593; doi:10.14814/phy2.14171), 2019-07-10

A

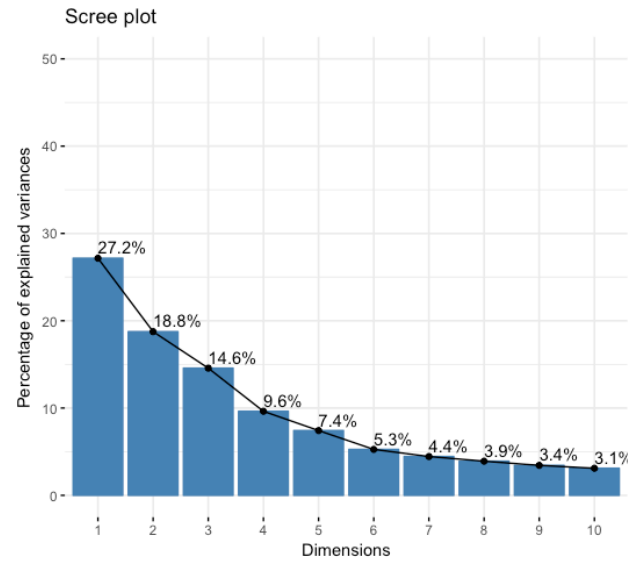

B

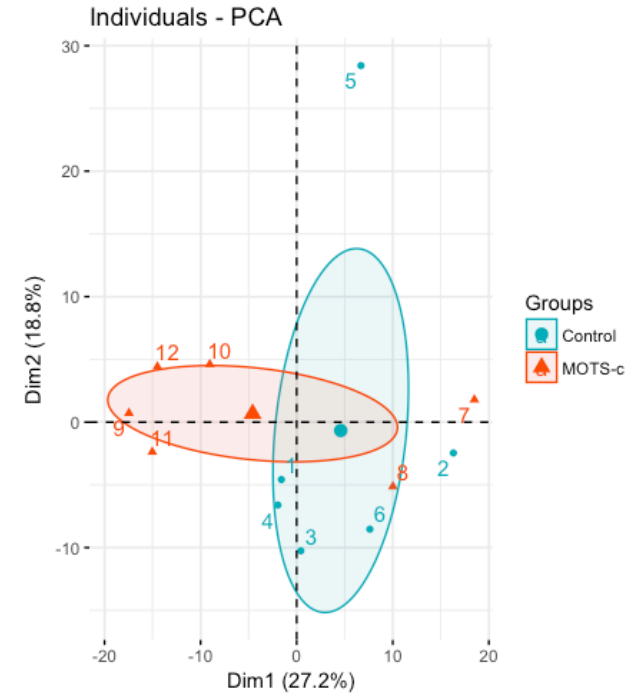

C

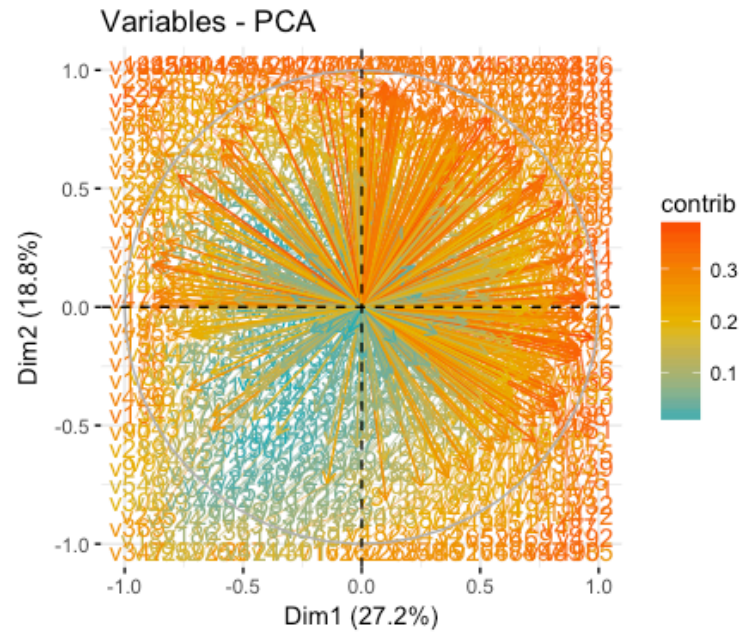

D

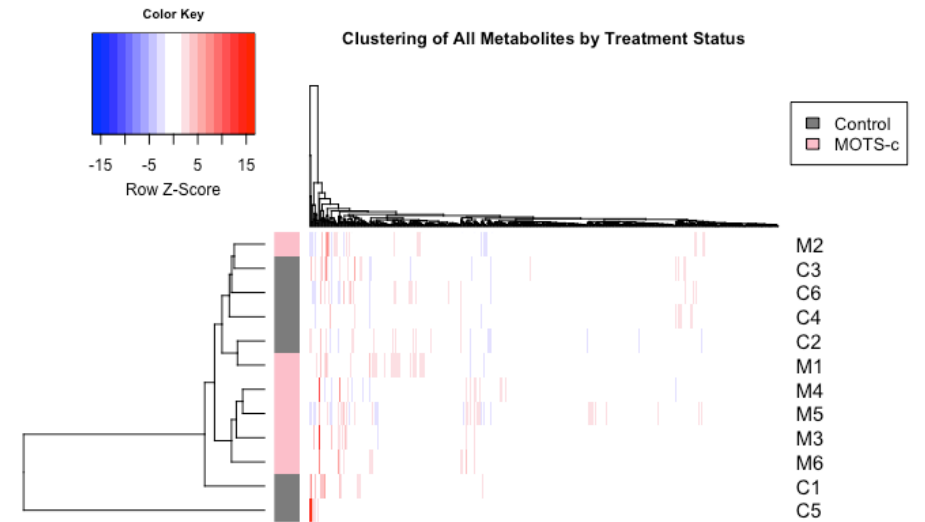

Supplement: PHY2-7-e14171-s001.pdf [file PHY2-7-e14171-s001.pdf]
